# Supplementary material for: Investigation into the bioavailability of milk protein-derived peptides with dipeptidyl-peptidase IV inhibitory activity using Caco-2 cell monolayers
Source: Royal Society of Chemistry journal article supplement (doi:10.1039/c6fo01411a), 2017-01-01
Supplement: c6fo01411a1.pdf [file c6fo01411a1.pdf]

**Table S1.** Elution time of the breakdown products derived from LPYPY, IPIQY, IPI and WR identified in the apical and basolateral compartments

| Peptide of origin | Sequence breakdown product | Elution time (min) <sup>a</sup> | Compartment |             |
|-------------------|----------------------------|---------------------------------|-------------|-------------|
|                   |                            |                                 | Apical      | Basolateral |
| LPYPY             | Y                          | 8.65                            | √           | √           |
|                   | PY                         | 10.51                           | √           |             |
|                   | YP                         | 11.03                           | √           | √           |
|                   | PYP                        | 12.22                           | √           |             |
|                   | LP                         | 12.44                           | √           | √           |
|                   | YPY                        | 13.67                           | √           | √           |
|                   | PYPY                       | 14.30                           | √           |             |
| IPIQY             | Y                          | 8.65                            | √           | √           |
|                   | IP                         | 11.79                           | √           | √           |
|                   | PI                         | 11.90                           | √           | √           |
|                   | IQY                        | 13.13                           | √           | √           |
|                   | IPIQ                       | 13.42                           | √           |             |
|                   | IPIQY                      | 15.82                           | √           | √           |
|                   | IPI                        | 15.87                           | √           | √           |
| IPI               | I                          | 9.15                            | √           | √           |
|                   | IP                         | 11.79                           | √           | √           |
|                   | PI                         | 11.90                           | √           | √           |
|                   | IPI                        | 15.87                           | √           | √           |
| WR                | W                          | 13.34                           | √           | √           |

<sup>a</sup> The elution time of the original intact peptides LPYPY, IPIQY, IPI and WR were 16.81, 15.82, 15.87 and 11.39 min, respectively.
